# Supplementary material
Source: ML conference proceedings conference paper supplement (https://aclanthology.org/D19-1272)
Supplement: Attachment [file D19-1272.Attachment.zip]

# Appendices for “Keep Calm and Switch On! Preserving Sentiment and Fluency in Semantic Text Exchange”

Steven Y. Feng\*

Aaron W. Li\*

Jesse Hoey

David R. Cheriton School of Computer Science  
University of Waterloo  
Waterloo, Ontario, Canada  
{sy2feng, w89li, jhoey}@uwaterloo.ca

## A Masked Output Examples

Table<sup>1</sup> 1 includes various example masked outputs by the ERM and SMM modules. We illustrate a variety of word-to-word, phrase-to-word, word-to-phrase, and phrase-to-phrase entity replacements and similarity masking.

## B Dataset Statistics

See Table 2 for our training and testing splits by dataset and sentiment.

## C Details of Baseline Implementations

### C.1 NWN-STEM

This follows Algorithm 2 in Yao et al. (2017). For each dataset and each  $RE$  (note that this model is restricted to noun  $RE$ s), we go through the dataset’s training set (which acts as the “reference review set”) and extract a list of text lines that contain the  $RE$  (where the  $RE$  acts as the “topic keyword”). For each of these lines, with the help of the Stanford Parser, we extract all single-word nouns, and for each of them (which we call  $noun_i$ ), we check if  $MIN_{sim}(noun_i, RE) > 0.1$ . If so, we add them to the list of nouns similar to the  $RE$ , which we call  $sim_{nouns}$ .

For each evaluation line and associated  $RE$ , we extract all singular nouns within the text that are similar to the  $RE$ . For our evaluation purposes, we choose two  $MIN_{sim}$  values of 0.075 and 0 to produce two outputs per input. These two  $MIN_{sim}$  values result in actual replacement rates similar to the actual masking/replacement rates of other models (SMERTI and W2V-STEM) for MRT/RRT of 20% and 40%, respectively. Each similar noun is replaced with the noun in  $sim_{nouns}$  that is most similar to it to produce the output text.

When analyzing every word during the above procedure, we take the first default WordNet synset’s definition of the word (e.g. “bill” will default to “a statute in draft before it becomes law”). Further, if a word does not exist in WordNet, we use WordNet’s Morphy to find if a lexically similar word exists that may just be in a different form (e.g. “photos” does not exist in WordNet, but using Morphy, we can find “photograph”) and use the first default synset of this resulting word.

Note that since the number of nouns per input is limited, the actual replacement rates have an upper limit, and this is why we only generate two outputs per input to compare to outputs of other models for 20% and 40% MRT/RRT.

### C.2 GWN-STEM

This is a modification of NWN-STEM to handle verbs and adjectives (note that WordNet only works for single words). On top of nouns, we also extract similar verbs and adjectives to the  $RE$ . This results in three lists:  $sim_{nouns}$ ,  $sim_{verbs}$ , and  $sim_{adjs}$ , where we still use a  $MIN_{sim}$  value of 0.1 for determining the three lists. Further, we not only replace nouns in the original text, but also verbs and adjectives. Note that we use the same synset and Morphy procedure as for NWN-STEM. For our evaluation, we choose the same  $MIN_{sim}$  values of 0.075 and 0 for noun  $RE$ s, but  $MIN_{sim}$  values of 0.1 and 0 for verb  $RE$ s. These combinations of  $MIN_{sim}$  values result in actual replacement rates similar to the actual masking/replacement rates of other models for MRT/RRT of 20% and 40%, respectively.

We noticed that GWN-STEM only works for noun and verb  $RE$ s, as for most adjectives, WordNet cannot calculate similarity scores. Hence, it was infeasible to evaluate on adjective  $RE$ s. Further, most similarity scores only exist between noun-noun pairs and verb-verb pairs, and when we

\* Authors contributed equally

<sup>1</sup>Tables and figures mentioned in this appendices document refer to the tables and figures here

|                        |                                                                                                        |
|------------------------|--------------------------------------------------------------------------------------------------------|
| <i>S</i>               | <i>family enjoyed the food quite a bit especially the sweet and sour chicken .</i>                     |
| <i>RE</i>              | <i>bitter</i>                                                                                          |
| <i>S''<sub>1</sub></i> | <i>family enjoyed the food quite a bit especially the sweet and bitter chicken .</i>                   |
| <i>S''<sub>2</sub></i> | <i>family [mask] the [mask] a bit especially the sweet and bitter [mask] .</i>                         |
| <i>S''<sub>3</sub></i> | <i>[mask] the [mask] bit [mask] the [mask] and bitter [mask] .</i>                                     |
| <i>S''<sub>4</sub></i> | <i>[mask] bit [mask] bitter [mask] .</i>                                                               |
| <i>S</i>               | <i>terrible customer service . couldn't make a wire transfer because they are out of paper .</i>       |
| <i>RE</i>              | <i>amazing</i>                                                                                         |
| <i>S''<sub>1</sub></i> | <i>amazing customer [mask] . couldn't make a wire transfer [mask] they are out of paper .</i>          |
| <i>S''<sub>2</sub></i> | <i>amazing customer [mask] . couldn't make a wire transfer [mask] they [mask] out of paper .</i>       |
| <i>S''<sub>3</sub></i> | <i>amazing [mask] . [mask] make a wire transfer [mask] out [mask] paper .</i>                          |
| <i>S''<sub>4</sub></i> | <i>amazing [mask] . [mask] a [mask] out [mask] .</i>                                                   |
| <i>S</i>               | <i>Heather enjoyed her movie date with Jim last night.</i>                                             |
| <i>RE</i>              | <i>yesterday</i>                                                                                       |
| <i>S''<sub>1</sub></i> | <i>heather [mask] her movie [mask] with jim yesterday .</i>                                            |
| <i>S''<sub>2</sub></i> | <i>heather [mask] her movie [mask] with jim yesterday .</i>                                            |
| <i>S''<sub>3</sub></i> | <i>heather [mask] her movie [mask] with jim yesterday .</i>                                            |
| <i>S''<sub>4</sub></i> | <i>[mask] yesterday .</i>                                                                              |
| <i>S</i>               | <i>Heather enjoyed her movie date with Jim last night.</i>                                             |
| <i>RE</i>              | <i>Elizabeth</i>                                                                                       |
| <i>S''<sub>1</sub></i> | <i>elizabeth enjoyed [mask] movie date with [mask] last night .</i>                                    |
| <i>S''<sub>2</sub></i> | <i>elizabeth enjoyed [mask] movie date with [mask] .</i>                                               |
| <i>S''<sub>3</sub></i> | <i>elizabeth enjoyed [mask] movie date with [mask] .</i>                                               |
| <i>S''<sub>4</sub></i> | <i>elizabeth enjoyed [mask] with [mask] .</i>                                                          |
| <i>S</i>               | <i>The car crashed into the building and exploded, killing hundreds.</i>                               |
| <i>RE</i>              | <i>caught on fire</i>                                                                                  |
| <i>S''<sub>1</sub></i> | <i>the car [mask] caught on fire and [mask] , killing hundreds .</i>                                   |
| <i>S''<sub>2</sub></i> | <i>[mask] caught on fire and [mask] , killing hundreds .</i>                                           |
| <i>S''<sub>3</sub></i> | <i>[mask] caught on fire and [mask] , killing hundreds .</i>                                           |
| <i>S''<sub>4</sub></i> | <i>[mask] caught on fire [mask] .</i>                                                                  |
| <i>S</i>               | <i>My son took his math test yesterday and failed. He cried all day and I hate him now.</i>            |
| <i>RE</i>              | <i>medical examination</i>                                                                             |
| <i>S''<sub>1</sub></i> | <i>[mask] took medical examination yesterday and [mask] . he cried all day and i hate [mask] now .</i> |
| <i>S''<sub>2</sub></i> | <i>[mask] took medical examination yesterday and [mask] . he cried all day and i hate [mask] now .</i> |
| <i>S''<sub>3</sub></i> | <i>[mask] took medical examination yesterday and [mask] . he cried all day and i hate [mask] now .</i> |
| <i>S''<sub>4</sub></i> | <i>[mask] medical examination [mask] and [mask] . [mask] .</i>                                         |
| <i>S</i>               | <i>I took my dog for a walk in the park. He really enjoyed it!</i>                                     |
| <i>RE</i>              | <i>the river</i>                                                                                       |
| <i>S''<sub>1</sub></i> | <i>i took my dog for [mask] in the river . he really enjoyed it !</i>                                  |
| <i>S''<sub>2</sub></i> | <i>i took [mask] for [mask] in the river . he really enjoyed it !</i>                                  |
| <i>S''<sub>3</sub></i> | <i>i [mask] for [mask] in the river . he [mask] !</i>                                                  |
| <i>S''<sub>4</sub></i> | <i>i [mask] the river . he [mask] !</i>                                                                |
| <i>S</i>               | <i>It is very sunny outside so I am very sweaty.</i>                                                   |
| <i>RE</i>              | <i>extremely snowy</i>                                                                                 |
| <i>S''<sub>1</sub></i> | <i>it is extremely snowy outside so i am [mask] .</i>                                                  |
| <i>S''<sub>2</sub></i> | <i>it is extremely snowy [mask] so i am [mask] .</i>                                                   |
| <i>S''<sub>3</sub></i> | <i>it [mask] extremely snowy [mask] i [mask] .</i>                                                     |
| <i>S''<sub>4</sub></i> | <i>[mask] extremely snowy [mask] .</i>                                                                 |
| <i>S</i>               | <i>I went to my friend Amy's house last night.</i>                                                     |
| <i>RE</i>              | <i>my husband Jim's</i>                                                                                |
| <i>S''<sub>1</sub></i> | <i>i went to my husband jim's house last night .</i>                                                   |
| <i>S''<sub>2</sub></i> | <i>i went to my husband jim's house [mask] .</i>                                                       |
| <i>S''<sub>3</sub></i> | <i>i went to my husband jim's [mask] .</i>                                                             |
| <i>S''<sub>4</sub></i> | <i>i [mask] my husband jim's [mask] .</i>                                                              |
| <i>S</i>               | <i>I went to my friend Amy's house last night.</i>                                                     |
| <i>RE</i>              | <i>my husband Jim's boat</i>                                                                           |
| <i>S''<sub>1</sub></i> | <i>i went to my husband jim's boat last night .</i>                                                    |
| <i>S''<sub>2</sub></i> | <i>i went to my husband jim's boat last night .</i>                                                    |
| <i>S''<sub>3</sub></i> | <i>i went to my husband jim's boat [mask] .</i>                                                        |
| <i>S''<sub>4</sub></i> | <i>i [mask] my husband jim's boat [mask] .</i>                                                         |

Table 1: Example masked outputs. *S* is the original input text; *RE* is the replacement entity; *S''<sub>1</sub>* corresponds to  $MRT = 0.2$ , base  $ST = 0.4$ ; *S''<sub>2</sub>* corresponds to  $MRT = 0.4$ , base  $ST = 0.3$ ; *S''<sub>3</sub>* corresponds to  $MRT = 0.6$ , base  $ST = 0.2$ ; *S''<sub>4</sub>* corresponds to  $MRT = 0.8$ , base  $ST = 0.1$

| Dataset        | Sentiment | Training Set | Testing Set |
|----------------|-----------|--------------|-------------|
| Amazon         | Positive  | 30K          | 5K          |
|                | Negative  | 30K          | 5K          |
|                | Neutral   | 15K          | 2.5K        |
| Yelp           | Positive  | 30K          | 5K          |
|                | Negative  | 30K          | 5K          |
|                | Neutral   | 15K          | 2.5K        |
| News Headlines | -         | 120K         | 20K         |

Table 2: Training and testing splits by dataset

tried to produce  $sim_{verbs}$  and  $sim_{adjs}$  for noun  $REs$ , almost all resulted in empty lists. Hence, GWN-STEM actually produced the same outputs as NWN-STEM for noun  $REs$  (and was also limited to two replacement rates), which is why the two models have the same outputs and resulting metrics for noun  $REs$ . Even for verb  $REs$ , we were limited to two sets of outputs (mimicking the two replacement rates above) since similarity calculations between verb-noun pairs and verb-adjective pairs were limited, so few were replaced.

### C.3 W2V-STEM

This uses Word2Vec (W2V) models trained using Gensim. We train six W2V models: one unigram model per dataset, and one four-gram model per dataset, where each is trained using the corresponding dataset’s training set. To train the four-gram models, we begin by applying a bi-gram phrasing model on top of the original text, and then the bi-gram phrasing model again on top of this resulting text. We call this a four-gram phrasing model. We then use this to generate text that is grouped into phrases up to four-grams long. We then train W2V models on this four-gram text to generate the four-gram W2V models.

For the unigram models, we use an embedding vector size of 50, a context window of 3, a minimum token count of 0, and the skip-gram model. For the four-gram models, we use an embedding vector size of 10, a context window of 1, a minimum token count of 0, and the CBOW (continuous bag-of-words) model.

For evaluation lines with noun, verb, and adjective  $REs$ , we go through the line of text and with the help of the Stanford parser, extract all words that are the same POS as the  $RE$  (which become the candidate  $OE$ s). Then, using cosine similarity between the W2V embedding vectors (from the unigram W2V models) of the  $RE$  and candidate  $OE$ s, we find the word with the maximum similarity to the  $RE$  which becomes the replaced  $OE$ . Then, we replace other words in the input text sim-

ilar to the  $OE$  using vector addition and subtraction as described in Section 4.3. We start with a similarity threshold value of 0.1 that increases by 0.05 each time to generate text satisfying varying replacement rate thresholds.

For evaluation lines with phrase  $REs$ , we first generate text files of the evaluation sets that are grouped into phrases up to four-grams long using the four-gram phrasing model. Then, using the four-gram W2V models, we proceed similarly as above to determine the replaced  $OE$ , which can now be either a single word or a phrase. Other words and phrases in the input text are replaced using vector addition and subtraction. We start with a similarity threshold value of 0.3 that increases by 0.01 each time to generate text satisfying varying replacement rate thresholds.

## D Evaluation Keywords/Phrases

We select ten keywords (five keyphrases) to act as our  $REs$  per dataset per POS. See Tables 3 to 6 for the chosen  $REs$ . To do so, we iterate through our test sets and with the Stanford Parser, we extract a list of nouns and noun phrases, verbs and verb phrases, and adjectives and adjective phrases. We sort these lists by frequency, and limit our selections to the top 10% most frequent. For the verbs and adjectives and their phrases, we further filter them through a list of sentiment words (Hu and Liu, 2004) to ensure the  $REs$  we choose do not carry significant sentiment-related meaning, as inserting them into the original text would obviously lead to major changes in sentiment. From these, we manually select ten per dataset per POS (except phrases, where we select five per dataset) that are significant and carry strong meaning. These work well as the  $REs$  for evaluation purposes. Note that for phrases, we choose three noun phrases, one verb phrase, and one adjective phrase per dataset.

We choose from the most frequent words and phrases as they are more common and likely hold more significant meaning compared to less frequent ones (e.g. names and typos). Manual selection was required as some of the most frequent words/phrases hold little semantic meaning (e.g. *it*, *they*, *is*, *was*, and so forth). We only choose half the number of phrases as words as we find that frequent phrases carrying significant semantic meaning with little sentiment are much rarer.

| Yelp       | Amazon  | News Headlines     |
|------------|---------|--------------------|
| Food       | Book    | Trump              |
| Service    | Product | Photos             |
| Place      | Time    | Video              |
| Staff      | Price   | World              |
| Time       | Quality | Women              |
| Customer   | Money   | Life               |
| Atmosphere | Game    | Kids               |
| Pizza      | Story   | People             |
| Restaurant | Movie   | Week               |
| Chicken    | Phone   | Obama / President* |

Table 3: Chosen evaluation noun *REs*. \*Obama does not exist in WordNet, so we instead use the word *President* for NWN-STEM and GWN-STEM.

| Yelp     | Amazon     | News Headlines |
|----------|------------|----------------|
| Ordered  | Buy        | Live           |
| Closed   | Ordered    | Think          |
| Tasted   | Received   | Make           |
| Return   | Expected   | Stop           |
| Waiting  | Purchased  | Watch          |
| Serve    | Reading    | Save           |
| Eating   | Advertised | Avoid          |
| Visiting | Install    | Learn          |
| Looking  | Playing    | Create         |
| Priced   | Recommend  | Teach          |

Table 4: Chosen evaluation verb *REs*

| Yelp    | Amazon      | News Headlines |
|---------|-------------|----------------|
| Small   | Different   | Black          |
| Little  | Light       | White          |
| New     | Predictable | Old            |
| Big     | Little      | American       |
| Mexican | Heavy       | National       |
| First   | Thick       | Sexual         |
| Long    | Plastic     | Single         |
| High    | Old         | Global         |
| Open    | New         | Presidential   |
| Busy    | First       | Female         |

Table 5: Chosen evaluation adjective *REs*

| Yelp             | Amazon       | News Headlines  |
|------------------|--------------|-----------------|
| Customer Service | My Daughter  | Donald Trump    |
| Your Money       | Another One  | Hillary Clinton |
| Las Vegas        | This Game    | Climate Change  |
| Come Back        | Put it Down  | Need to Know    |
| Very Small       | Much Smaller | Most Important  |

Table 6: Chosen evaluation phrase *REs*

## E Detailed Evaluation Results - Tables and Graphs

See Figure 1 for a graph of overall average results, Table 7 and Figure 2 for average results by POS, Table 8 and Figure 3 for average results by dataset, and Table 9 and Figure 4 for average results by MRT/RRT. Note that the bolded values in the tables show which model performs better on that particular metric, on average, for the category.

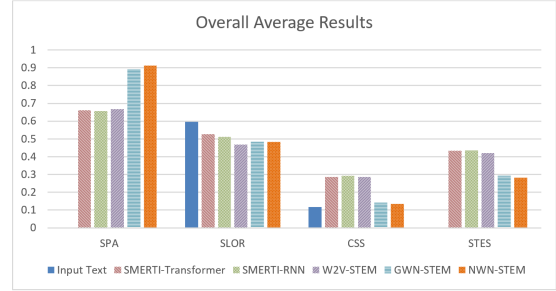

Figure 1: Graph of overall average results (referring to the data found in Table 2 of the main body)

## F Model Output Examples

See Tables 10 to 21 for example outputs from every model for all datasets and POS.

## References

- Minqing Hu and Bing Liu. 2004. Mining and summarizing customer reviews. In *Proceedings of the tenth ACM SIGKDD international conference on Knowledge discovery and data mining*, pages 168–177. ACM.
- Yuanshun Yao, Bimal Viswanath, Jenna Cryan, Haitao Zheng, and Ben Y Zhao. 2017. Automated crowd-turfing attacks and defenses in online review systems. In *Proceedings of the 2017 ACM SIGSAC Conference on Computer and Communications Security*, pages 1143–1158. ACM.

| Model              | MRT/<br>RRT | Nouns         |               |               | Verbs         |               |               | Adjectives    |               |               | Phrases       |               |               |
|--------------------|-------------|---------------|---------------|---------------|---------------|---------------|---------------|---------------|---------------|---------------|---------------|---------------|---------------|
|                    |             | SPA           | SLOR          | CSS           |
| Input              | ---         | ---           | 0.5971        | 0.1175        | ---           | 0.5960        | 0.1287        | ---           | 0.5977        | 0.0935        | ---           | 0.5939        | 0.1267        |
| SMERTI-Transformer | 20%         | 0.8560        | 0.5493        | 0.2591        | 0.7887        | 0.5358        | 0.2152        | 0.7517        | 0.5421        | 0.2003        | 0.7971        | 0.5806        | 0.3028        |
|                    | 40%         | 0.7610        | 0.5382        | 0.2683        | 0.7143        | 0.5286        | 0.2215        | 0.6688        | 0.5326        | 0.2059        | 0.7060        | 0.5753        | 0.3178        |
|                    | 60%         | 0.6707        | 0.5200        | 0.2899        | 0.6328        | 0.5193        | 0.2461        | 0.5798        | 0.5091        | 0.2286        | 0.6016        | 0.5661        | 0.3516        |
|                    | 80%         | 0.5638        | 0.4592        | 0.3613        | 0.5003        | 0.4783        | 0.3409        | 0.4832        | 0.4360        | 0.3222        | 0.4933        | 0.5379        | 0.4395        |
|                    | AVG         | 0.7129        | <b>0.5167</b> | 0.2947        | 0.6590        | <b>0.5155</b> | 0.2559        | <b>0.6209</b> | <b>0.5049</b> | 0.2392        | 0.6495        | <b>0.5650</b> | 0.3529        |
|                    | STES        |               | 0.4456        |               |               | <b>0.4073</b> |               |               | 0.3861        |               |               | 0.4884        |               |
| SMERTI-RNN         | 20%         | 0.8568        | 0.5443        | 0.2620        | 0.7946        | 0.5299        | 0.2170        | 0.7576        | 0.5338        | 0.2048        | 0.7924        | 0.5751        | 0.3075        |
|                    | 40%         | 0.7602        | 0.5273        | 0.2725        | 0.7204        | 0.5145        | 0.2243        | 0.6641        | 0.5161        | 0.2109        | 0.7040        | 0.5673        | 0.3242        |
|                    | 60%         | 0.6688        | 0.5023        | 0.2979        | 0.6290        | 0.4967        | 0.2507        | 0.5792        | 0.4871        | 0.2365        | 0.5996        | 0.5565        | 0.3604        |
|                    | 80%         | 0.5570        | 0.4397        | 0.3744        | 0.4889        | 0.4590        | 0.3477        | 0.4718        | 0.4139        | 0.3376        | 0.4736        | 0.5313        | 0.4541        |
|                    | AVG         | 0.7107        | 0.5034        | 0.3017        | 0.6582        | 0.5000        | 0.2599        | 0.6182        | 0.4877        | 0.2474        | 0.6424        | 0.5576        | <b>0.3615</b> |
|                    | STES        |               | <b>0.4472</b> |               |               | <b>0.4073</b> |               |               | <b>0.3891</b> |               |               | <b>0.4905</b> |               |
| W2V-STEM           | 20%         | 0.9038        | 0.5342        | 0.2804        | 0.8207        | 0.5140        | 0.2360        | 0.7724        | 0.5158        | 0.2251        | 0.8987        | 0.6078        | 0.2992        |
|                    | 40%         | 0.7628        | 0.4734        | 0.3063        | 0.7160        | 0.4484        | 0.2694        | 0.6348        | 0.4525        | 0.2490        | 0.7693        | 0.5626        | 0.2954        |
|                    | 60%         | 0.6354        | 0.4216        | 0.3232        | 0.6124        | 0.3941        | 0.2965        | 0.5108        | 0.4016        | 0.2668        | 0.6280        | 0.5237        | 0.2913        |
|                    | 80%         | 0.5233        | 0.3864        | 0.3374        | 0.5168        | 0.3551        | 0.3170        | 0.4209        | 0.3702        | 0.2794        | 0.5411        | 0.5136        | 0.2892        |
|                    | AVG         | 0.7063        | 0.4539        | <b>0.3118</b> | 0.6665        | 0.4279        | <b>0.2797</b> | 0.5847        | 0.4350        | <b>0.2551</b> | <b>0.7093</b> | 0.5519        | 0.2938        |
|                    | STES        |               | 0.4395        |               |               | 0.4047        |               |               | 0.3784        |               |               | 0.4528        |               |
| GWN-STEM           | 20%         | 0.9291        | 0.5043        | 0.1288        | 0.9177        | 0.5421        | 0.1372        |               |               |               |               |               |               |
|                    | 40%         | 0.8941        | 0.4621        | 0.1381        | 0.8203        | 0.4372        | 0.1635        |               |               |               |               |               |               |
|                    | AVG         | <b>0.9116</b> | 0.4832        | 0.1335        | <b>0.8690</b> | 0.4896        | 0.1504        |               |               |               |               |               |               |
|                    | STES        |               | 0.2814        |               |               | 0.3048        |               |               |               |               |               |               |               |
| NWN-STEM           | 20%         | 0.9291        | 0.5043        | 0.1288        |               |               |               |               |               |               |               |               |               |
|                    | 40%         | 0.8941        | 0.4621        | 0.1381        |               |               |               |               |               |               |               |               |               |
|                    | AVG         | <b>0.9116</b> | 0.4832        | 0.1335        |               |               |               |               |               |               |               |               |               |
|                    | STES        |               | 0.2814        |               |               |               |               |               |               |               |               |               |               |

Table 7: Average results by POS

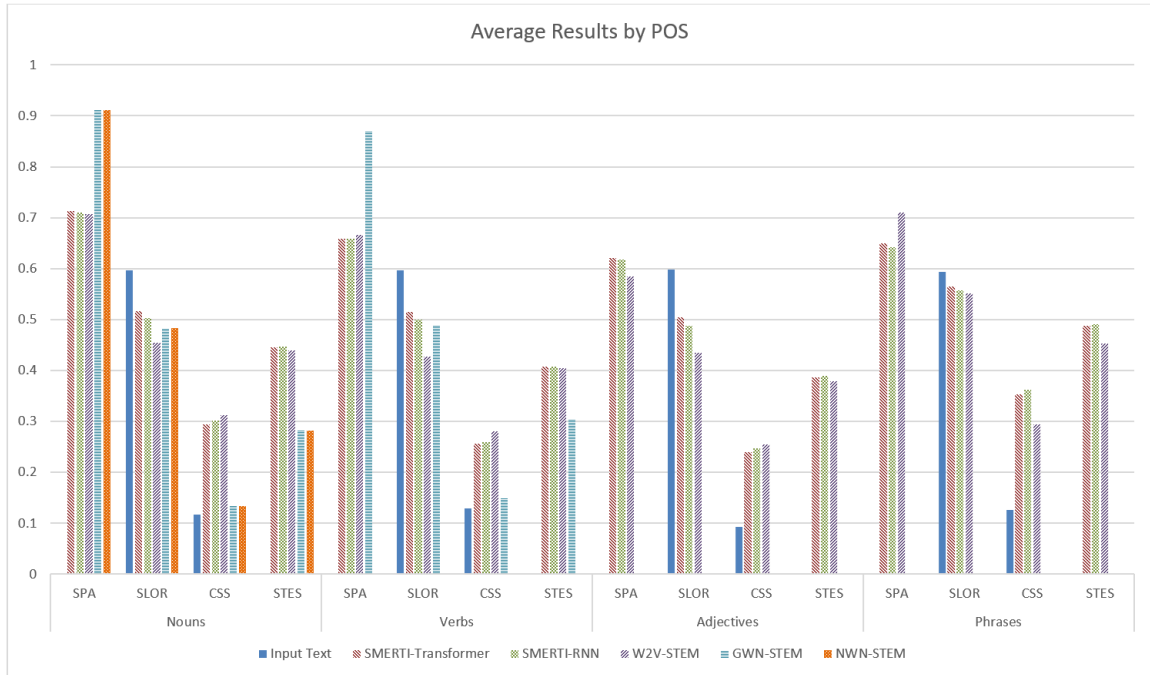

Figure 2: Graph of average results by POS

| Model              | MRT/<br>RRT | Amazon Reviews |               |               | Yelp Reviews  |               |               | News Headlines |               |               |
|--------------------|-------------|----------------|---------------|---------------|---------------|---------------|---------------|----------------|---------------|---------------|
|                    |             | SPA            | SLOR          | CSS           | SPA           | SLOR          | CSS           | SPA            | SLOR          | CSS           |
| Input              | ---         | ---            | 0.6230        | 0.1113        | ---           | 0.5532        | 0.1429        | ---            | 0.6123        | 0.0955        |
| SMERTI-Transformer | 20%         | 0.8140         | 0.5773        | 0.2336        | 0.8544        | 0.5162        | 0.2497        | 0.7267         | 0.5623        | 0.2497        |
|                    | 40%         | 0.7168         | 0.5709        | 0.2410        | 0.7800        | 0.5055        | 0.2577        | 0.6408         | 0.5547        | 0.2615        |
|                    | 60%         | 0.6363         | 0.5550        | 0.2663        | 0.6981        | 0.4804        | 0.2759        | 0.5293         | 0.5503        | 0.2950        |
|                    | 80%         | 0.5408         | 0.4776        | 0.3598        | 0.5781        | 0.4045        | 0.3370        | 0.4116         | 0.5514        | 0.4011        |
|                    | AVG         | 0.6770         | <b>0.5452</b> | 0.2752        | 0.7276        | <b>0.4767</b> | 0.2801        | 0.5771         | <b>0.5547</b> | 0.3018        |
|                    | STES        | 0.4319         |               |               | 0.4260        |               |               | 0.4380         |               |               |
| SMERTI-RNN         | 20%         | 0.8113         | 0.5779        | 0.2354        | 0.8488        | 0.5174        | 0.2522        | 0.7409         | 0.5420        | 0.2559        |
|                    | 40%         | 0.7198         | 0.5634        | 0.2441        | 0.7733        | 0.5037        | 0.2621        | 0.6434         | 0.5268        | 0.2677        |
|                    | 60%         | 0.6318         | 0.5390        | 0.2714        | 0.6970        | 0.4786        | 0.2831        | 0.5286         | 0.5144        | 0.3047        |
|                    | 80%         | 0.5195         | 0.4636        | 0.3709        | 0.5608        | 0.4058        | 0.3505        | 0.4132         | 0.5136        | 0.4140        |
|                    | AVG         | 0.6706         | 0.5360        | <b>0.2804</b> | 0.7200        | 0.4764        | 0.2870        | 0.5815         | 0.5242        | <b>0.3106</b> |
|                    | STES        | <b>0.4333</b>  |               |               | <b>0.4302</b> |               |               | <b>0.4382</b>  |               |               |
| W2V-STEM           | 20%         | 0.8628         | 0.5649        | 0.2526        | 0.8868        | 0.5158        | 0.2661        | 0.7971         | 0.5481        | 0.2619        |
|                    | 40%         | 0.7468         | 0.4902        | 0.2728        | 0.7675        | 0.4634        | 0.2865        | 0.6478         | 0.4990        | 0.2808        |
|                    | 60%         | 0.6201         | 0.4258        | 0.2867        | 0.6391        | 0.4167        | 0.3007        | 0.5308         | 0.4633        | 0.2960        |
|                    | 80%         | 0.5185         | 0.3898        | 0.2978        | 0.5316        | 0.3879        | 0.3118        | 0.4515         | 0.4413        | 0.3077        |
|                    | AVG         | 0.6870         | 0.4677        | 0.2775        | 0.7063        | 0.4459        | <b>0.2912</b> | 0.6068         | 0.4880        | 0.2866        |
|                    | STES        | 0.4168         |               |               | 0.4230        |               |               | 0.4175         |               |               |
| GWN-STEM           | 20%         | 0.9605         | 0.5509        | 0.1232        | 0.9638        | 0.4924        | 0.1674        | 0.8458         | 0.5262        | 0.1085        |
|                    | 40%         | 0.9078         | 0.4649        | 0.1330        | 0.9347        | 0.4250        | 0.1783        | 0.7292         | 0.4591        | 0.1410        |
|                    | AVG         | 0.9342         | 0.5079        | 0.1281        | 0.9493        | 0.4587        | 0.1729        | 0.7875         | 0.4926        | 0.1248        |
|                    | STES        | 0.2766         |               |               | 0.3327        |               |               | 0.2651         |               |               |
| NWN-STEM           | 20%         | 0.9573         | 0.5287        | 0.1042        | 0.9693        | 0.4732        | 0.1645        | 0.8607         | 0.5110        | 0.1178        |
|                    | 40%         | 0.9337         | 0.4818        | 0.1182        | 0.9537        | 0.4302        | 0.1727        | 0.7950         | 0.4741        | 0.1234        |
|                    | AVG         | <b>0.9455</b>  | 0.5053        | 0.1112        | <b>0.9615</b> | 0.4517        | 0.1686        | <b>0.8278</b>  | 0.4926        | 0.1206        |
|                    | STES        | 0.2493         |               |               | 0.3266        |               |               | 0.2602         |               |               |

Table 8: Average results by dataset

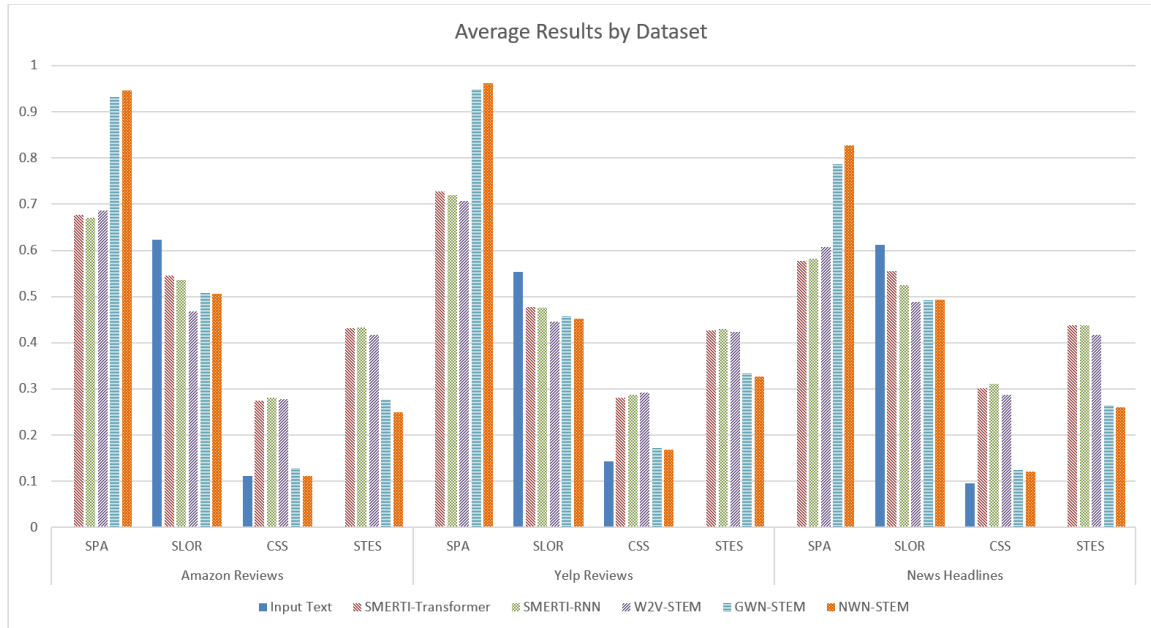

Figure 3: Graph of average results by dataset

| <u>Model</u>       | <u>MRT/<br/>RRT</u> | <u>Overall Averages</u> |               |               |               |               |
|--------------------|---------------------|-------------------------|---------------|---------------|---------------|---------------|
|                    |                     | <u>Actual<br/>MR/RR</u> | <u>SPA</u>    | <u>SLOR</u>   | <u>CSS</u>    | <u>STES</u>   |
| Input              | ---                 | ---                     | ---           | 0.5962        | 0.1166        | ---           |
| SMERTI-Transformer | 20%                 | 13.98%                  | 0.7984        | 0.5519        | 0.2443        | 0.4192        |
|                    | 40%                 | 31.58%                  | 0.7125        | 0.5437        | 0.2534        | 0.4173        |
|                    | 60%                 | 51.50%                  | 0.6212        | 0.5286        | 0.2791        | 0.4234        |
|                    | 80%                 | 74.58%                  | 0.5102        | 0.4778        | 0.3659        | 0.4421        |
|                    | AVG                 | 42.91%                  | 0.6606        | <b>0.5255</b> | 0.2857        | 0.4337        |
| SMERTI-RNN         | 20%                 | 13.99%                  | 0.8003        | 0.5458        | 0.2478        | 0.4215        |
|                    | 40%                 | 31.61%                  | 0.7122        | 0.5313        | 0.2580        | 0.4189        |
|                    | 60%                 | 51.55%                  | 0.6191        | 0.5107        | 0.2864        | 0.4246        |
|                    | 80%                 | 74.60%                  | 0.4978        | 0.4610        | 0.3785        | 0.4399        |
|                    | AVG                 | 42.94%                  | 0.6574        | 0.5122        | <b>0.2927</b> | <b>0.4354</b> |
| W2V-STEM           | 20%                 | 12.98%                  | 0.8489        | 0.5429        | 0.2602        | 0.4371        |
|                    | 40%                 | 29.00%                  | 0.7207        | 0.4842        | 0.2800        | 0.4271        |
|                    | 60%                 | 48.95%                  | 0.5967        | 0.4353        | 0.2945        | 0.4071        |
|                    | 80%                 | 70.01%                  | 0.5005        | 0.4063        | 0.3057        | 0.3881        |
|                    | AVG                 | 40.24%                  | 0.6667        | 0.4672        | 0.2851        | 0.4197        |
| GWN-STEM           | 20%                 | 16.52%                  | 0.9234        | 0.5232        | 0.1330        | 0.2854        |
|                    | 40%                 | 33.85%                  | 0.8572        | 0.4496        | 0.1508        | 0.2993        |
|                    | AVG                 | 25.18%                  | 0.8903        | 0.4864        | 0.1419        | 0.2934        |
| NWN-STEM           | 20%                 | 19.05%                  | 0.9291        | 0.5043        | 0.1288        | 0.2772        |
|                    | 40%                 | 30.26%                  | 0.8941        | 0.4621        | 0.1381        | 0.2851        |
|                    | AVG                 | 24.65%                  | <b>0.9116</b> | 0.4832        | 0.1335        | 0.2814        |

Table 9: Average results by MRT/RRT

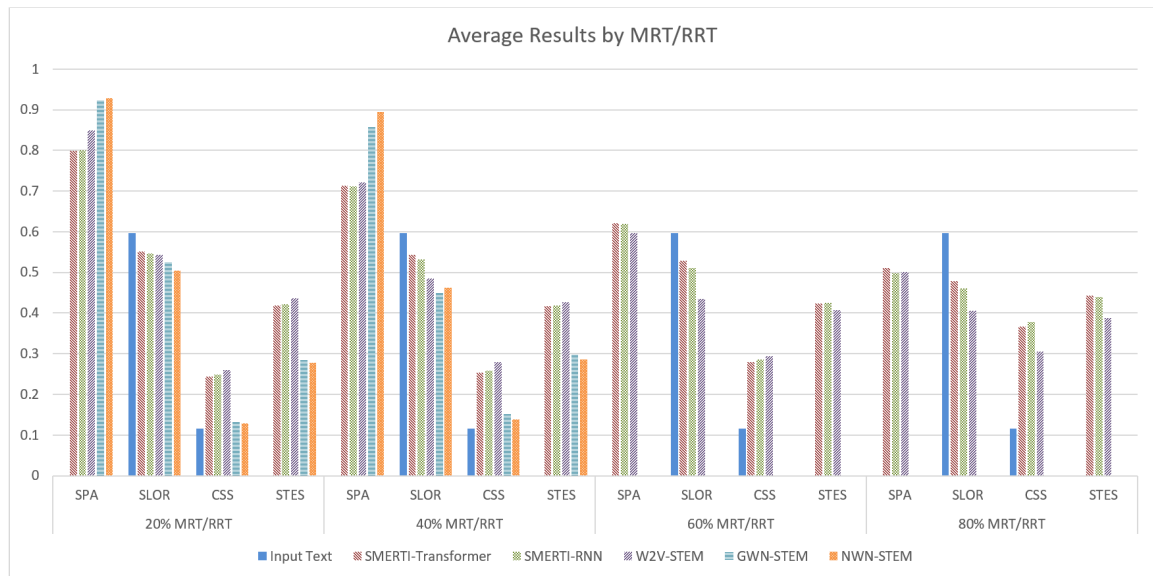

Figure 4: Graph of average results by MRT/RRT

| Amazon - Noun <i>RE</i>     |                                                                                                                                                             |
|-----------------------------|-------------------------------------------------------------------------------------------------------------------------------------------------------------|
| <u>Input:</u>               | bought this in a few colors and simply love the style . highly recommend purchasing this as well as other colors .                                          |
| <u>RE:</u>                  | book                                                                                                                                                        |
| <b>MRT/RRT</b>              | <b>Generated Output</b>                                                                                                                                     |
| <u>SMERTI-Transformer</u>   |                                                                                                                                                             |
| 20%                         | bought this in a few chapters and i love the book . highly recommend purchasing this as well as the product .                                               |
| 40%                         | bought this in my kindle and absolutely love the book . highly recommend purchasing this as a gift as well .                                                |
| 60%                         | bought this in my kindle and absolutely love the book . highly recommend purchasing this as a gift as well .                                                |
| 80%                         | bought this book in august and love the book . i highly recommend purchasing it .                                                                           |
| <u>SMERTI-RNN</u>           |                                                                                                                                                             |
| 20%                         | bought this in a few months and i love the book . highly recommend purchasing this as well as needed .                                                      |
| 40%                         | bought this in my style and i love the book . highly recommend purchasing this as a gift as advertised .                                                    |
| 60%                         | bought this in my review and went through in a leg and in the book . i recommend purchasing this .                                                          |
| 80%                         | bought this in my review and went through in a leg and in the book . i recommend purchasing this .                                                          |
| <u>W2V-STEM</u>             |                                                                                                                                                             |
| 20%                         | bought this in a few item and simply love the book . highly recommend purchasing this as well as other item.                                                |
| 40%                         | bought this in a few item application thing episode the book . highly recommend purchasing this as well as other item .                                     |
| 60%                         | bought preview page a few item application thing episode page book . despite reccomend purchasing preview as fully as other item .                          |
| 80%                         | purchased preview page information few item application thing episode page book . despite reccomend refunded preview possible fully possible reviews item . |
| <u>GWN-STEM / NWN-STEM</u>  |                                                                                                                                                             |
| 20%<br>(0.075 $MIN_{sim}$ ) | bought this in a few decal and simply love the style . highly recommend purchasing this as well as other decal .                                            |
| 40%<br>(0 $MIN_{sim}$ )     | bought movie in a few decal and simply love the locations . highly recommend purchasing movie as well as other decal .                                      |

Table 10: Example outputs for an Amazon evaluation line with noun *RE*

| Amazon - Verb <i>RE</i>   |                                                                                                                                                             |
|---------------------------|-------------------------------------------------------------------------------------------------------------------------------------------------------------|
| <u>Input:</u>             | i didnt even get these . and i think i ordered them like last year . and i think that is ridiculous !                                                       |
| <u>RE:</u>                | buy                                                                                                                                                         |
| <b>MRT/RRT</b>            | <b>Generated Output</b>                                                                                                                                     |
| <u>SMERTI-Transformer</u> |                                                                                                                                                             |
| 20%                       | i don't even buy these . and i think i ordered a like last year . and i think that was ridiculous !                                                         |
| 40%                       | do not buy these . and i ordered the wrong one for my year . and they are ridiculous !                                                                      |
| 60%                       | do not buy this product . i ordered another pair . it's ridiculous !                                                                                        |
| 80%                       | don't buy this product . terrible screen protector . will not buy again !                                                                                   |
| <u>SMERTI-RNN</u>         |                                                                                                                                                             |
| 20%                       | i don't even buy these . and i think i ordered more like last year . and i think that it's ridiculous !                                                     |
| 40%                       | i would buy these . and i ordered them like a year . and from a ridiculous !                                                                                |
| 60%                       | don't buy this product . i ordered a x . w extremely ridiculous !                                                                                           |
| 80%                       | don't buy this . a good rip . recommended !                                                                                                                 |
| <u>W2V-STEM</u>           |                                                                                                                                                             |
| 20%                       | i didnt even buy these . and i yes i ordered them like last year . and i yes that is ridiculous !                                                           |
| 40%                       | purchasing didnt buyers buy these . definitely purchasing yes purchasing ordered them like last year . definitely purchasing yes that smells ridiculous !   |
| 60%                       | purchasing didn't buyers buy these . definitely purchasing yes purchasing bought theses like chinese year . definitely purchasing yes yes smells worthy !   |
| 80%                       | purchasing didn't buyers buy pair . definitely purchasing yes purchasing bought theses recomend chinese yrs . definitely purchasing yes yes smells worthy ! |
| <u>GWN-STEM</u>           |                                                                                                                                                             |
| 20%<br>(0.1 $MIN_{sim}$ ) | i didnt even get these . and i think i ordered them like last yrs . and i think that was ridiculous !                                                       |
| 40%<br>(0 $MIN_{sim}$ )   | i didnt even get knowledge . and i think i requested knowledge like last yrs . and i think knowledge was ridiculous !                                       |

Table 11: Example outputs for an Amazon evaluation line with verb *RE*

| Amazon - Adjective <i>RE</i> |                                                                                               |
|------------------------------|-----------------------------------------------------------------------------------------------|
| <u>Input:</u>                | was way too small . i had ordered a xlt , it probably was a medium .                          |
| <u>RE:</u>                   | predictable                                                                                   |
| MRT/RRT                      | Generated Output                                                                              |
| <u>SMERTI-Transformer</u>    |                                                                                               |
| 20%                          | was not too predictable . i had ordered a wow , it probably was a waste of money .            |
| 40%                          | was too predictable . i had ordered a wow , but the book probably was a waste of time .       |
| 60%                          | was too predictable . i had ordered a wow , but the book probably was a waste of time .       |
| 80%                          | easily predictable . i like a twist , it took a long time to finish .                         |
| <u>SMERTI-RNN</u>            |                                                                                               |
| 20%                          | was too predictable . i had ordered a refund , it probably was a little disappointing .       |
| 40%                          | was too very predictable . i had ordered a refund , but probably was a disappointing format . |
| 60%                          | was too very predictable . i had ordered a refund , but probably was a disappointing format . |
| 80%                          | very predictable . i like a refund , but a little heavy .                                     |
| <u>W2V-STEM</u>              |                                                                                               |
| 20%                          | was way too predictable . i had ordered a xlt , it probably was a plot .                      |
| 40%                          | was plot plot predictable . i had ordered a xlt , it probably was a plot .                    |
| 60%                          | was plot plot predictable . i had trilogy action xlt , plot author was action plot .          |
| 80%                          | ending plot plot predictable . plot had trilogy action xlt , plot author ending action plot . |

Table 12: Example outputs for an Amazon evaluation line with adjective *RE*

| Amazon - Phrase <i>RE</i> |                                                                                                                        |
|---------------------------|------------------------------------------------------------------------------------------------------------------------|
| <u>Input:</u>             | bought for my friendz's baby i hope she likes it . it looks cute . baby will like it . small small cute                |
| <u>RE:</u>                | my daughter                                                                                                            |
| MRT/RRT                   | Generated Output                                                                                                       |
| <u>SMERTI-Transformer</u> |                                                                                                                        |
| 20%                       | bought for my daughter i hope she likes it . it looks cute . she will like it . very nice                              |
| 40%                       | bought for my daughter i think she likes it . it fits great . she will like it . don't recommend                       |
| 60%                       | i bought this for my daughter i and she loved it . it fits great too . i will like it . thanks                         |
| 80%                       | i bought this for my daughter for christmas and she loves it . she like it . the color is great                        |
| <u>SMERTI-RNN</u>         |                                                                                                                        |
| 20%                       | bought for my daughter i hope she likes it . it looks cute . i will like it . thank you                                |
| 40%                       | bought for my daughter i and she likes it . it worked well . i will like it . thank you                                |
| 60%                       | bought this item for my daughter and she loves it . she loves it . she will like it again . i love it                  |
| 80%                       | love my daughter loves it . very good . he                                                                             |
| <u>W2V-STEM</u>           |                                                                                                                        |
| 20%                       | bought for my daughter friendz's baby i hope she likes it it looks cute baby will like it small small cute             |
| 40%                       | bought for my daughter friendz's thing i hope she likes great smell cute baby will like great quality quality if       |
| 60%                       | bought for my daughter friendz's thing i would not rock solid great smell cute baby will like great quality quality if |
| 80%                       | balinese my daughter friendz's thing i would not rock solid great smell cute baby as easy great quality quality if     |

Table 13: Example outputs for an Amazon evaluation line with phrase *RE*

| <b>Yelp - Noun <i>RE</i></b> |                                                                                                                                     |
|------------------------------|-------------------------------------------------------------------------------------------------------------------------------------|
| <b>Input:</b>                | i love this place! very nice people running the cafe and the food is always good . stars!                                           |
| <b><i>RE</i>:</b>            | service                                                                                                                             |
| <b>MRT/RRT</b>               | <b>Generated Output</b>                                                                                                             |
| <u>SMERTI-Transformer</u>    |                                                                                                                                     |
| 20%                          | i love this place! very nice people running the service and the food is always good. stars!                                         |
| 40%                          | i love this place! very nice people running the service and the food is always good. food is delicious!                             |
| 60%                          | i love this place! very nice people running the service and the food is always good. food is delicious!                             |
| 80%                          | i love this place! great service and food. best egg rolls!                                                                          |
| <u>SMERTI-RNN</u>            |                                                                                                                                     |
| 20%                          | i love this place! very nice people running the service and the food is always good. stars!                                         |
| 40%                          | i love this place! very nice people running the service and food is always good. thanks!                                            |
| 60%                          | i love this place! very nice people running the service and food is always good. thanks!                                            |
| 80%                          | i love this place! good service and fast. exceptional customer service!                                                             |
| <u>W2V-STEM</u>              |                                                                                                                                     |
| 20%                          | i love this place ! very nice people running the cafe also the service is always great . stars !                                    |
| 40%                          | i love this place ! very nice people running the cafe also the service is always great . stars !                                    |
| 60%                          | i love staff gym ! extremely knowledgable people running unbelievable boutique also unbelievable service was always great . stars ! |
| 80%                          | i love staff gym ! extremely knowledgable people running unbelievable boutique also unbelievable service was always great . stars ! |
| <u>GWN-STEM / NWN-STEM</u>   |                                                                                                                                     |
| 20%<br>(0.075 $MIN_{sim}$ )  | i quality this quantities ! very nice people running the cafe and the quantities is always good . stars !                           |
| 40%<br>(0 $MIN_{sim}$ )      | i quality this quantities ! very nice people running the movie and the quantities is always good . movie !                          |

Table 14: Example outputs for a Yelp evaluation line with noun *RE*

| Yelp - Verb <i>RE</i>     |                                                                                                      |
|---------------------------|------------------------------------------------------------------------------------------------------|
| <u>Input:</u>             | my favorite spot for lunch . they are quick and the food is always consistently excellent .          |
| <u>RE:</u>                | ordered                                                                                              |
| <b>MRT/RRT</b>            | <b>Generated Output</b>                                                                              |
| <u>SMERTI-Transformer</u> |                                                                                                      |
| 20%                       | my favorite spot for lunch . i ordered quick and the food is always consistently excellent .         |
| 40%                       | my favorite spot for lunch . i ordered quick service and the food is always consistently excellent . |
| 60%                       | our favorite spot for lunch . i ordered quick and always fresh and excellent .                       |
| 80%                       | fun spot for lunch . i ordered sashimi it was excellent .                                            |
| <u>SMERTI-RNN</u>         |                                                                                                      |
| 20%                       | my favorite spot for lunch . i ordered quick and the food is always consistently excellent .         |
| 40%                       | my favorite spot for lunch . always ordered quick delivery food and always consistently excellent .  |
| 60%                       | my favorite spot for lunch . always ordered quick and always always excellent .                      |
| 80%                       | great spot for lunch . everything we ordered was excellent .                                         |
| <u>W2V-STEM</u>           |                                                                                                      |
| 20%                       | my favorite spot for lunch . they are quick and the food ordered always teriyaki excellent .         |
| 40%                       | my favorite spot for lunch . they are quick raw the lamb ordered always teriyaki excellent .         |
| 60%                       | my favorite spot got lunch . they were takeout raw pulled lamb ordered picked teriyaki excellent .   |
| 80%                       | my favorite spot got lunch . they were takeout raw pulled lamb ordered picked teriyaki excellent .   |
| <u>GWN-STEM</u>           |                                                                                                      |
| 20%<br>(0.1 $MIN_{sim}$ ) | my favorite spot for lunch . they are quick and the food is always consistently excellent .          |
| 40%<br>(0 $MIN_{sim}$ )   | my favorite spot for lunch . they dropped quick and the food dropped always consistently excellent . |

Table 15: Example outputs for a Yelp evaluation line with verb *RE*

| Yelp - Adjective <i>RE</i> |                                                                                                        |
|----------------------------|--------------------------------------------------------------------------------------------------------|
| <u>Input:</u>              | bad ass vegan options ! everything we had was awesome ! keep it rad guys thanks !                      |
| <u>RE:</u>                 | mexican                                                                                                |
| MRT/RRT                    | Generated Output                                                                                       |
| <u>SMERTI-Transformer</u>  |                                                                                                        |
| 20%                        | bad ass mexican options ! everything we had was awesome ! keep it rad guys thanks !                    |
| 40%                        | bad service and mexican options ! everything we had was awesome ! keep up your rad guys thanks !       |
| 60%                        | great mexican food ! we had was awesome ! keep it up thanks !                                          |
| 80%                        | best mexican food ! wings are awesome ! love the service thanks !                                      |
| <u>SMERTI-RNN</u>          |                                                                                                        |
| 20%                        | bad ass mexican options ! everything we had was awesome ! keep it rad guys thanks !                    |
| 40%                        | bad little mexican options ! everything we had was awesome ! keep to crowded and funny guys thanks !   |
| 60%                        | best mexican food ! we had was awesome ! keep coming back thanks !                                     |
| 80%                        | best mexican cuisine ! super awesome ! great service and wonderful thanks !                            |
| <u>W2V-STEM</u>            |                                                                                                        |
| 20%                        | bad ass mexican court ! everything we had was awesome ! keep it rad guys thanks !                      |
| 40%                        | bad ass mexican court ! chinese we had was awesome ! keep it rad guys thanks !                         |
| 60%                        | bad ass mexican court ! chinese we experienced was outstanding ! keep it hall guys thanks !            |
| 80%                        | shitty ass mexican court ! chinese visiting experienced is outstanding ! keep just hall folks thanks ! |

Table 16: Example outputs for a Yelp evaluation line with adjective *RE*

| Yelp - Phrase <i>RE</i>   |                                                                                   |
|---------------------------|-----------------------------------------------------------------------------------|
| <u>Input:</u>             | cheap ! employees are nice ! great place to go to have a tuna sandwich !          |
| <u>RE:</u>                | come back                                                                         |
| MRT/RRT                   | Generated Output                                                                  |
| <u>SMERTI-Transformer</u> |                                                                                   |
| 20%                       | cheap ! employees were nice ! great place to come back and have a tuna sandwich ! |
| 40%                       | cheap ! employees were nice ! great place to come back for a tuna shop !          |
| 60%                       | cheap ! employees are rude ! ill come back for a tuna sandwich !                  |
| 80%                       | cheap ! employees are rude ! ill come back for a short time !                     |
| <u>SMERTI-RNN</u>         |                                                                                   |
| 20%                       | cheap ! employees are nice ! great will come back and have a tuna sandwich !      |
| 40%                       | cheap ! employees are nice ! great will come back for a tuna meal !               |
| 60%                       | cheap ! employees are amazing ! will never come back with a tuna and cheese !     |
| 80%                       | cheap ! employees are amazing ! will definitely come back with a friend !         |
| <u>W2V-STEM</u>           |                                                                                   |
| 20%                       | come back employees are nice great place to go to have a tuna sandwich            |
| 40%                       | come back employees are nice great place to go to have a tuna sandwich            |
| 60%                       | come back employees are nice great place to go to have a tuna sandwich            |
| 80%                       | come back didn't even patio our server patio would be our server tuna sandwich    |

Table 17: Example outputs for a Yelp evaluation line with phrase *RE*

| News Headlines - Noun <i>RE</i> |                                                                                    |
|---------------------------------|------------------------------------------------------------------------------------|
| <u>Input:</u>                   | trump's tactic twitter fights distract from absence of policy positions            |
| <u>RE:</u>                      | video                                                                              |
| MRT/RRT                         | Generated Output                                                                   |
| <u>SMERTI-Transformer</u>       |                                                                                    |
| 20%                             | trump's election campaign video exposes hypocrisy from absence of policy positions |
| 40%                             | trump's campaign says twitter video is from a surge of policy positions            |
| 60%                             | trump's latest video captures news from the power of controversial positions       |
| 80%                             | trump's new video of                                                               |
| <u>SMERTI-RNN</u>               |                                                                                    |
| 20%                             | trump's america's twitter video goes from absence of policy positions              |
| 40%                             | trump's instagram twitter video goes from a state of policy positions              |
| 60%                             | trump's instagram video looks from women of russia positions                       |
| 80%                             | trump's pick video about thursday                                                  |
| <u>W2V-STEM</u>                 |                                                                                    |
| 20%                             | trump's tactic twitter fights distract from absence of policy video                |
| 40%                             | trump's photo twitter photo photo from photo of policy video                       |
| 60%                             | trump's photo instagram photo photo from photo of election video                   |
| 80%                             | trump's photo instagram photo photo during photo captures election video           |
| <u>GWN-STEM / NWN-STEM</u>      |                                                                                    |
| 20%<br>(0.075 $MIN_{sim}$ )     | evidence plan twitter battle distract from lack of plan location                   |
| 40%<br>(0 $MIN_{sim}$ )         | evidence plan twitter battle distract from lack of plan location                   |

Table 18: Example outputs for a news headlines evaluation line with noun *RE*

| News Headlines - Verb <i>RE</i> |                                                |
|---------------------------------|------------------------------------------------|
| <u>Input:</u>                   | identity theft it's not just for grownups !    |
| <u>RE:</u>                      | save                                           |
| MRT/RRT                         | Generated Output                               |
| <u>SMERTI-Transformer</u>       |                                                |
| 20%                             | identity theft it's not to save grownups !     |
| 40%                             | identity theft could save grownups !           |
| 60%                             | identity theft could save grownups !           |
| 80%                             | let's save money !                             |
| <u>SMERTI-RNN</u>               |                                                |
| 20%                             | identity theft it's not to save grownups !     |
| 40%                             | identity theft doesn't save grownups !         |
| 60%                             | identity theft doesn't save grownups !         |
| 80%                             | ways to save yourself !                        |
| <u>W2V-STEM</u>                 |                                                |
| 20%                             | identity theft itsave not just for improve !   |
| 40%                             | improve cell itsave not just for improve !     |
| 60%                             | improve cell itsave not just for improve !     |
| 80%                             | improve cell itsave not soon improve improve ! |
| <u>GWN-STEM</u>                 |                                                |
| 20%<br>(0.1 $MIN_{sim}$ )       | space theft it's not just for grownups !       |
| 40%<br>(0 $MIN_{sim}$ )         | space space space's not just for jeopardy !    |

Table 19: Example outputs for a news headlines evaluation line with verb *RE*

| News Headlines - Adjective <i>RE</i> |                                                                                                         |
|--------------------------------------|---------------------------------------------------------------------------------------------------------|
| <u>Input:</u>                        | hasan minhaj comparing donald trump to stereotypical indian uncles is gold                              |
| <u>RE:</u>                           | american                                                                                                |
| MRT/RRT                              | Generated Output                                                                                        |
| <u>SMERTI-Transformer</u>            |                                                                                                         |
| 20%                                  | the american comparing donald trump to create indian uncles is gold                                     |
| 40%                                  | the american comparing donald trump to artists who made me uncles                                       |
| 60%                                  | the american evolution of trump to win is gold                                                          |
| 80%                                  | defining american anti trump struggle                                                                   |
| <u>SMERTI-RNN</u>                    |                                                                                                         |
| 20%                                  | this american comparing donald trump to the indian uncles is gold                                       |
| 40%                                  | the american comparing donald trump to tell uncles is gold                                              |
| 60%                                  | african american university president trump to congress is gold                                         |
| 80%                                  | african american leader on trump rally                                                                  |
| <u>W2V-STEM</u>                      |                                                                                                         |
| 20%                                  | hasan minhaj comparing donald trump to stereotypical american uncles is gold                            |
| 40%                                  | hypochondriacs hypochondriacs comparing donald trump to hypochondriacs american uncles is gold          |
| 60%                                  | hypochondriacs hypochondriacs comparing donald trump to hypochondriacs american uncles is gold          |
| 80%                                  | hypochondriacs hypochondriacs discuss donald trump but hypochondriacs american hypochondriacs is soccer |

Table 20: Example outputs for a news headlines evaluation line with adjective *RE*

| News Headlines - Phrase <i>RE</i> |                                                         |
|-----------------------------------|---------------------------------------------------------|
| <u>Input:</u>                     | kindergarten teacher allegedly drinks beer at school    |
| <u>RE:</u>                        | donald trump                                            |
| MRT/RRT                           | Generated Output                                        |
| <u>SMERTI-Transformer</u>         |                                                         |
| 20%                               | donald trump allegedly drinks beer at mexico            |
| 40%                               | donald trump allegedly drinks beer president            |
| 60%                               | donald trump makes beer cans                            |
| 80%                               | donald trump will not apologize                         |
| <u>SMERTI-RNN</u>                 |                                                         |
| 20%                               | donald trump allegedly drinks beer at now               |
| 40%                               | donald trump allegedly drinks beer in big race          |
| 60%                               | donald trump takes a beer debate                        |
| 80%                               | donald trump cabinet challenge                          |
| <u>W2V-STEM</u>                   |                                                         |
| 20%                               | kindergarten teacher donald trump drinks beer at school |
| 40%                               | kindergarten teacher donald trump drinks beer at school |
| 60%                               | kindergarten teacher donald trump drinks beer bigger    |
| 80%                               | kindergarten teacher donald trump drinks beer bigger    |

Table 21: Example outputs for a news headlines evaluation line with phrase *RE*
